# Supplementary material for: The Effectiveness of Mobile Phone-Based Care for Weight Control in Metabolic Syndrome Patients: Randomized Controlled Trial
Source: PubMed Central journal article supplement (PMC4705013; doi:10.2196/mhealth.4222), 2015-08-20
Supplement: mhealth_v3i3e83_app1.pdf [file mhealth_v3i3e83_app1.pdf]

| Characteristic               |                    | Intervention group,<br>N=212 | Control group,<br>N=210 | <i>P</i> value     |
|------------------------------|--------------------|------------------------------|-------------------------|--------------------|
| <b>Age</b>                   |                    |                              |                         |                    |
|                              | n                  | 212                          | 210                     |                    |
|                              | Mean (SD)          | 46.78 (13.11)                | 50.35 (14.24)           | .0077 <sup>a</sup> |
|                              | Median             | 48.00                        | 52.00                   |                    |
|                              | Min, max           | 20.00, 72.00                 | 21.00, 82.00            |                    |
|                              | 20-29 years, n (%) | 23 (10.9)                    | 18 (8.6)                | .2691 <sup>b</sup> |
|                              | 30-39 years, n (%) | 48 (22.6)                    | 40 (19.1)               |                    |
|                              | 40-49 years, n (%) | 42 (19.8)                    | 34 (16.2)               |                    |
|                              | 50-59 years, n (%) | 59 (27.8)                    | 61 (29.1)               |                    |
|                              | ≥60 years, n (%)   | 40 (18.9)                    | 57 (27.1)               |                    |
| <b>Sex</b>                   |                    |                              |                         |                    |
|                              | n                  | 212                          | 210                     |                    |
|                              | Male, n (%)        | 113 (53.3)                   | 102 (48.6)              | .3311 <sup>b</sup> |
|                              | Female, n (%)      | 99 (46.7)                    | 108 (51.4)              |                    |
| <b>BMI, kg/m<sup>2</sup></b> |                    |                              |                         |                    |
|                              | n                  | 212                          | 209                     |                    |
|                              | Mean (SD)          | 29.42 (3.53)                 | 29.40 (3.39)            | .9342 <sup>a</sup> |
|                              | Median             | 28.70                        | 28.90                   |                    |
|                              | Min, max           | 24.90, 46.80                 | 24.90, 41.80            |                    |
| <b>Weight, kg</b>            |                    |                              |                         |                    |
|                              | n                  | 212                          | 209                     |                    |
|                              | Mean (SD)          | 81.13 (14.77)                | 79.74 (15.28)           | .3427 <sup>a</sup> |
|                              | Median             | 79.85                        | 76.90                   |                    |
|                              | Min, max           | 55.20, 144.00                | 54.00, 14.10            |                    |
| <b>Height, cm</b>            |                    |                              |                         |                    |
|                              | n                  | 212                          | 209                     |                    |
|                              | Mean (SD)          | 165.58 (9.18)                | 164.12 (10.61)          | .1310 <sup>a</sup> |
|                              | Median             | 166.40                       | 163.00                  |                    |
|                              | Min, max           | 144.50, 188.90               | 142.80, 189.00          |                    |
| <b>Smoking, n (%)</b>        |                    |                              |                         |                    |
|                              | n                  | 211                          | 203                     |                    |
|                              | Non-smoker         | 127 (60.2)                   | 129 (63.6)              | .4753 <sup>b</sup> |

|                         |                            |            |            |                    |
|-------------------------|----------------------------|------------|------------|--------------------|
|                         | Former-smoker              | 52 (24.6)  | 40 (19.7)  |                    |
|                         | Smoker                     | 32 (15.2)  | 34 (16.8)  |                    |
| <b>Drinking, n (%)</b>  |                            |            |            |                    |
|                         | n                          | 211        | 206        |                    |
|                         | Non-drinker                | 78 (37.0)  | 84 (10.8)  | .7258 <sup>b</sup> |
|                         | Former-drinker             | 16 (7.6)   | 15 (7.3)   |                    |
|                         | Drinker                    | 117 (55.5) | 107 (51.9) |                    |
| <b>Education, n (%)</b> |                            |            |            |                    |
|                         | n                          | 212        | 210        |                    |
|                         | Uneducated                 | 0 (0.0)    | 0 (0.0)    | .0011 <sup>b</sup> |
|                         | Primary school graduate    | 4 (1.9)    | 21 (10.0)  |                    |
|                         | Middle school graduate     | 9 (4.3)    | 15 (7.1)   |                    |
|                         | High school graduate       | 63 (29.7)  | 65 (31.0)  |                    |
|                         | College graduate or higher | 136 (61.2) | 109 (51.9) |                    |

<sup>a</sup>Two-sample *t* test

<sup>b</sup>Pearson's chi-square test
